# Supplementary material
Source: Springer Nature journal article supplement (https://www.springermedizin.de/resource/supplementary/12936_2011_1946_MOESM15_ESM.pdf/9542110)
Supplement: MOESM15 [file 9542110]

MFD: 10042006

LOT:

030406

EXP: 04/2009

Keep out of reach of children.  
Preserve in well closed, light-resistant containers.  
Store in a cool place.

# COTECXIN®

## Dihydroartemisinin Tablets

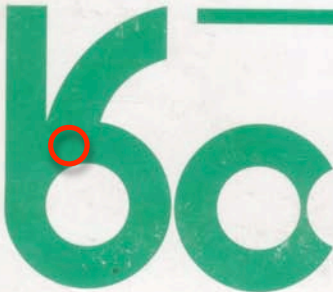

60mg x 8 tablets

All forms of malaria. Orally, once a day, for 5 or 7 days in succession. See enclosed insert.

Jiaxing Nanhu Pharmaceutical Co., Ltd.  
No.205 Yunhai Road, Economy Development Zone, Jiaxing City  
Mfg. under license of:  
Beijing Holley-Cotec Pharmaceuticals Co., Ltd.

1-4

Jiaxing Nanhu Pharmaceutiquie S.A.R.L.  
205 Avenue Yunhai, Zone de Développement  
Economique, Jiaxing Chine  
Sous licence de  
Laboratoires Pharmaceutiques Beijing Holley-Cotec

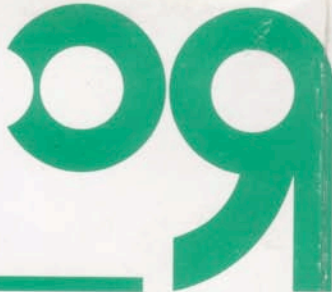

Toutes sortes de malaria. Voie  
buccale, une fois le jour, 5 à 7 jours  
consécutifs. Voir les instructions ci-  
incluses.

60mg x 8 comprimés

Comprimé de Dihydroartémisinine

# COTECXIN®
